# Supplementary material for: The estimation of a preference-based single index for the IBS-QoL by mapping to the EQ-5D-5L in patients with irritable bowel syndrome
Source: Springer Nature journal article supplement (doi:10.1007/s11136-021-02995-y), 2021-09-21
Supplement: MOESM1 [file 19684286]

*Title manuscript:* The estimation of a preference-based single index for the IBS-QoL by mapping to the EQ-5D-5L in patients with irritable bowel syndrome.

*Journal:* Quality of Life Research

*Authors:* Rosel Sturkenboom MD<sup>1,2</sup>, Daniel Keszthelyi MD PhD<sup>1</sup>, Lloyd Brandts PhD<sup>2</sup>, Zsa Zsa R M Weerts MD<sup>1</sup>, Johanna T W Snijkers MD<sup>1</sup>, Ad A M Masclee Prof MD PhD<sup>1</sup>, Brigitte A B Essers PhD<sup>2</sup>

<sup>1</sup> Division of Gastroenterology-Hepatology, Department of Internal Medicine, NUTRIM School for Nutrition and Translational Research in Metabolism, Maastricht University Medical Center, Maastricht, The Netherlands.

<sup>2</sup> Department of Clinical Epidemiology and Medical Technology Assessment, CAPHRI Care and Public Health Research Institute, Maastricht University Medical Center, Maastricht, The Netherlands.

*E-mail address of corresponding author:* [rosel.sturkenboom@mumc.nl](mailto:rosel.sturkenboom@mumc.nl)

## Supplementary Table 1

### Mapping equations from IBS-QoL score to EQ-5D-5L to IBS using OLS regression

|                                 | <i>Model 1</i><br>Total IBS-QoL score |         | <i>Model 2</i><br>Total IBS-QoL score + IBS-SSS + age |           | <i>Model 3</i><br>Two domains IBS-QoL: Dysphoria score + Body image score |         | <i>Model 4</i><br>Total IBS-QoL score + Squared IBS-SSS score |           | <i>Model 5</i><br>Dysphoria score + Body image score + squared IBS-SSS + age |            |
|---------------------------------|---------------------------------------|---------|-------------------------------------------------------|-----------|---------------------------------------------------------------------------|---------|---------------------------------------------------------------|-----------|------------------------------------------------------------------------------|------------|
| Type of analysis                | OLS                                   |         | OLS                                                   |           | OLS                                                                       |         | OLS                                                           |           | OLS                                                                          |            |
|                                 | Coef f.                               | SE      | Coeff.                                                | SE        | Coef f.                                                                   | SE      | Coef f.                                                       | SE        | Coef f.                                                                      | SE         |
| Constant                        | 0.229                                 | 0.061** | 0.443                                                 | 0.096**   | 0.297                                                                     | 0.054** | 0.385                                                         | 0.077**   | 0.449                                                                        | 0.076**    |
| IBS-QoL total score             | 0.007                                 | 0.001** | 0.006                                                 | 0.001**   |                                                                           |         | 0.006                                                         | 0.001**   |                                                                              |            |
| IBS-SSS score                   |                                       |         | -0.00049                                              | 0.00018** |                                                                           |         |                                                               |           |                                                                              |            |
| Age                             |                                       |         | -0.0008                                               | 0.0009    |                                                                           |         |                                                               |           | -0.0005                                                                      | 0.001      |
| IBS-QoL domain Dysphoria score  |                                       |         |                                                       |           | 0.004                                                                     | 0.001** |                                                               |           | 0.003                                                                        | 0.0007**   |
| IBS-QoL domain Body Image score |                                       |         |                                                       |           | 0.002                                                                     | 0.001** |                                                               |           | 0.002                                                                        | 0.0008*    |
| Squared IBS-SSS score           |                                       |         |                                                       |           |                                                                           |         | -1.03E-6                                                      | 3.24E-7** | 9.36e-07                                                                     | 3.32e-07** |

Coeff. = Coefficients, determined by regression analysis in STATA. SE: Standardized Error. Significance \* p < 0.05, \*\* p < 0.01. IBS-QoL total score: Score between 0-100. IBS-SSS score: score between 0 and 500 defining the severity of IBS.
