# Supplementary material for: The estimation of a preference-based single index for the IBS-QoL by mapping to the EQ-5D-5L in patients with irritable bowel syndrome
Source: Springer Nature journal article supplement (doi:10.1007/s11136-021-02995-y), 2021-09-21
Supplement: MOESM2 [file 19684286]

*Title manuscript:* The estimation of a preference-based single index for the IBS-QoL by mapping to the EQ-5D-5L in patients with irritable bowel syndrome.

*Journal:* Quality of Life Research

*Authors:* Rosel Sturkenboom MD<sup>1,2</sup>, Daniel Keszthelyi MD PhD<sup>1</sup>, Lloyd Brandts PhD<sup>2</sup>, Zsa Zsa R M Weerts MD<sup>1</sup>, Johanna T W Snijkers MD<sup>1</sup>, Ad A M Masclee Prof MD PhD<sup>1</sup>, Brigitte A B Essers PhD<sup>2</sup>

<sup>1</sup> Division of Gastroenterology-Hepatology, Department of Internal Medicine, NUTRIM School for Nutrition and Translational Research in Metabolism, Maastricht University Medical Center, Maastricht, The Netherlands.

<sup>2</sup> Department of Clinical Epidemiology and Medical Technology Assessment, CAPHRI Care and Public Health Research Institute, Maastricht University Medical Center, Maastricht, The Netherlands.

*E-mail address of corresponding author:* [rosel.sturkenboom@mumc.nl](mailto:rosel.sturkenboom@mumc.nl)

## Supplementary table 2

### Mapping equations from IBS-QoL to EQ-5D-5L score using CLAD regression

|                                 | <i>Model 1<br/>Total IBS-QoL score</i> |       | <i>Model 2<br/>Total IBS-QoL score + IBS-SSS + age</i> |        | <i>Model 3<br/>Two domains IBS-QoL: Dysphoria score + Body image score</i> |       | <i>Model 4<br/>Total IBS-QoL score + Squared IBS-SSS score</i> |         | <i>Model 5<br/>Dysphoria score + Body image score + squared IBS-SSS + age</i> |          |
|---------------------------------|----------------------------------------|-------|--------------------------------------------------------|--------|----------------------------------------------------------------------------|-------|----------------------------------------------------------------|---------|-------------------------------------------------------------------------------|----------|
| <b>Type of analysis</b>         | <b>Clad</b>                            |       | <b>Clad</b>                                            |        | <b>Clad</b>                                                                |       | <b>Clad</b>                                                    |         | <b>Clad</b>                                                                   |          |
|                                 | Coeff                                  | SE    | Coeff.                                                 | SE     | Coeff                                                                      | SE    | Coeff.                                                         | SE      | Coeff                                                                         | SE       |
| Constant                        | 0.408                                  | 0.114 | 0.511                                                  | 0.114  | 0.451                                                                      | 0.108 | 0.471                                                          | 0.099   | 0.482                                                                         | 0.098    |
| IBS-QoL total score             | 0.005                                  | 0.001 | 0.005                                                  | 0.001  |                                                                            |       | 0.005                                                          | 0.001   |                                                                               |          |
| IBS-SSS score                   |                                        |       | -0.0002                                                | 0.0001 |                                                                            |       |                                                                |         |                                                                               |          |
| Age                             |                                        |       | -0.001                                                 | 0.0009 |                                                                            |       |                                                                |         | -0.001                                                                        | 0.0008   |
| IBS-QoL domain Dysphoria score  |                                        |       |                                                        |        | 0.004                                                                      | 0.001 |                                                                |         | 0.004                                                                         | 0.001    |
| IBS-QoL domain Body Image score |                                        |       |                                                        |        | 0.001                                                                      | 0.001 |                                                                |         | 0.001                                                                         | 0.001    |
| Squared IBS-SSS score           |                                        |       |                                                        |        |                                                                            |       | -4.83E-7                                                       | 3.59e-7 | 3.75e-07                                                                      | 3.11e-07 |

Coeff. = Coefficients, determined by CLAD analysis in STATA. SE: Standardized Error.

IBS-QoL total score: Score between 0-100. IBS-SSS score: score between 0 and 500 defining the severity of IBS.
