# Supplementary material for: The estimation of a preference-based single index for the IBS-QoL by mapping to the EQ-5D-5L in patients with irritable bowel syndrome
Source: Springer Nature journal article supplement (doi:10.1007/s11136-021-02995-y), 2021-09-21
Supplement: MOESM3 [file 19683200]

*Title manuscript:* The estimation of a preference-based single index for the IBS-QoL by mapping to the EQ-5D-5L in patients with irritable bowel syndrome.

*Journal:* Quality of Life Research

*Authors:* Rosel Sturkenboom MD<sup>1,2</sup>, Daniel Keszthelyi MD PhD<sup>1</sup>, Lloyd Brandts PhD<sup>2</sup>, Zsa Zsa R M Weerts MD<sup>1</sup>, Johanna T W Snijkers MD<sup>1</sup>, Ad A M Masclee Prof MD PhD<sup>1</sup>, Brigitte A B Essers PhD<sup>2</sup>

<sup>1</sup> Division of Gastroenterology-Hepatology, Department of Internal Medicine, NUTRIM School for Nutrition and Translational Research in Metabolism, Maastricht University Medical Center, Maastricht, The Netherlands.

<sup>2</sup> Department of Clinical Epidemiology and Medical Technology Assessment, CAPHRI Care and Public Health Research Institute, Maastricht University Medical Center, Maastricht, The Netherlands.

*E-mail address of corresponding author:* [rosel.sturkenboom@mumc.nl](mailto:rosel.sturkenboom@mumc.nl)

### Supplementary table 3

#### Mapping equations from IBS-QoL to EQ-5D-5L score using ALDVM models

##### Model 1

| N_NLEQ5D5L_0       | Coef.     | Std. Err. | z      | P> z  | [95% Conf. Interval] |           |
|--------------------|-----------|-----------|--------|-------|----------------------|-----------|
| Comp_1             |           |           |        |       |                      |           |
| N_QOL_totalscore_0 | .0000188  | .0003018  | 0.06   | 0.950 | -.0005728            | .0006104  |
| _cons              | .8745529  | .0223461  | 39.14  | 0.000 | .8307554             | .9183504  |
| Comp_2             |           |           |        |       |                      |           |
| N_QOL_totalscore_0 | .0015819  | .0001953  | 8.10   | 0.000 | .0011991             | .0019646  |
| _cons              | .7303442  | .0137961  | 52.94  | 0.000 | .7033044             | .7573841  |
| Comp_3             |           |           |        |       |                      |           |
| N_QOL_totalscore_0 | .0084149  | .0015697  | 5.36   | 0.000 | .0053384             | .0114914  |
| _cons              | -.0001242 | .1135621  | -0.00  | 0.999 | -.2227019            | .2224535  |
| Comp_4             |           |           |        |       |                      |           |
| N_QOL_totalscore_0 | .0042495  | .0005319  | 7.99   | 0.000 | .0032071             | .0052919  |
| _cons              | .470006   | .0404947  | 11.61  | 0.000 | .3906379             | .5493742  |
| Prob_C1            |           |           |        |       |                      |           |
| _cons              | -.7988692 | .375672   | -2.13  | 0.033 | -1.535173            | -.0625656 |
| Prob_C2            |           |           |        |       |                      |           |
| _cons              | -.7903465 | .4026044  | -1.96  | 0.050 | -1.579437            | -.0012563 |
| Prob_C3            |           |           |        |       |                      |           |
| _cons              | .073574   | .289447   | 0.25   | 0.799 | -.4937318            | .6408798  |
| /lns_1             | -4.197175 | .1912816  | -21.94 | 0.000 | -4.57208             | -3.82227  |
| /lns_2             | -4.59725  | .2146898  | -21.41 | 0.000 | -5.018034            | -4.176466 |
| /lns_3             | -1.550841 | .0966175  | -16.05 | 0.000 | -1.740208            | -1.361474 |
| /lns_4             | -3.176991 | .1824914  | -17.41 | 0.000 | -3.534667            | -2.819314 |
| sigma1             | .015038   | .0028765  |        |       | .0103364             | .0218781  |
| sigma2             | .0100795  | .002164   |        |       | .0066175             | .0153527  |
| sigma3             | .2120695  | .0204896  |        |       | .1754839             | .2562827  |
| sigma4             | .041711   | .0076119  |        |       | .0291685             | .0596468  |
| pi1                | .1509586  | .0457759  |        |       | .0811292             | .2636463  |
| pi2                | .1522506  | .0479998  |        |       | .0797356             | .2712739  |
| pi3                | .361206   | .0521542  |        |       | .2663636             | .4682638  |
| pi4                | .3355848  | .0578582  |        |       | .2221847             | .4489848  |

## Model 2

| N_NLEQ5D5L_0         | Coef.     | Std. Err. | z      | P> z  | [95% Conf. Interval] |           |
|----------------------|-----------|-----------|--------|-------|----------------------|-----------|
| Comp_1               |           |           |        |       |                      |           |
| N_QOL_totalscore_0   | .0006314  | .0003847  | 1.64   | 0.101 | -.0001226            | .0013854  |
| N_SSS_Eindscore_0    | -.0000559 | .000079   | -0.71  | 0.479 | -.0002108            | .0000989  |
| N_LEEFTIJD_SCREENING | .0003033  | .0003325  | 0.91   | 0.362 | -.0003483            | .000955   |
| _cons                | .8158511  | .0448087  | 18.21  | 0.000 | .7280278             | .9036745  |
| Comp_2               |           |           |        |       |                      |           |
| N_QOL_totalscore_0   | .0044806  | .0017009  | 2.63   | 0.008 | .0011469             | .0078144  |
| N_SSS_Eindscore_0    | -.0008834 | .0004141  | -2.13  | 0.033 | -.0016951            | -.0000717 |
| N_LEEFTIJD_SCREENING | -.0020032 | .0029254  | -0.68  | 0.493 | -.0077368            | .0037303  |
| _cons                | .3346758  | .1909066  | 1.75   | 0.080 | -.0394943            | .7088459  |
| Comp_3               |           |           |        |       |                      |           |
| N_QOL_totalscore_0   | .0037621  | .0008812  | 4.27   | 0.000 | .002035              | .0054892  |
| N_SSS_Eindscore_0    | -.000677  | .0002355  | -2.87  | 0.004 | -.0011386            | -.0002154 |
| N_LEEFTIJD_SCREENING | .0009462  | .0011221  | 0.84   | 0.399 | -.0012531            | .0031455  |
| _cons                | .4824217  | .0917241  | 5.26   | 0.000 | .3026457             | .6621977  |
| Comp_4               |           |           |        |       |                      |           |
| N_QOL_totalscore_0   | .0048154  | .0006595  | 7.30   | 0.000 | .0035229             | .006108   |
| N_SSS_Eindscore_0    | -.0000119 | .0001199  | -0.10  | 0.921 | -.0002469            | .0002231  |
| N_LEEFTIJD_SCREENING | -.001631  | .0007988  | -2.04  | 0.041 | -.0031965            | -.0000654 |
| _cons                | .4859942  | .0723942  | 6.71   | 0.000 | .3441041             | .6278843  |
| Prob_C1              |           |           |        |       |                      |           |
| _cons                | -.2671206 | .3125627  | -0.85  | 0.393 | -.8797323            | .3454911  |
| Prob_C2              |           |           |        |       |                      |           |
| _cons                | -1.500278 | .3521834  | -4.26  | 0.000 | -2.190544            | -.8100108 |
| Prob_C3              |           |           |        |       |                      |           |
| _cons                | -1.194805 | .3717771  | -3.21  | 0.001 | -1.923474            | -.466135  |
| /lns_1               | -3.542181 | .1635771  | -21.65 | 0.000 | -3.862786            | -3.221576 |
| /lns_2               | -2.225104 | .2644117  | -8.42  | 0.000 | -2.743341            | -1.706866 |
| /lns_3               | -3.002799 | .2428768  | -12.36 | 0.000 | -3.478829            | -2.526769 |
| /lns_4               | -2.908221 | .1343496  | -21.65 | 0.000 | -3.171541            | -2.6449   |
| sigma1               | .0289501  | .0047356  |        |       | .0210094             | .0398921  |
| sigma2               | .1080562  | .0285713  |        |       | .064355              | .1814334  |
| sigma3               | .0496479  | .0120583  |        |       | .0308435             | .0799168  |
| sigma4               | .0545727  | .0073318  |        |       | .0419389             | .0710124  |
| pi1                  | .3341087  | .0601875  |        |       | .2279561             | .4602263  |
| pi2                  | .0973497  | .0284185  |        |       | .0541212             | .1689392  |
| pi3                  | .1321295  | .0389786  |        |       | .0725284             | .2286346  |
| pi4                  | .4364121  | .0654839  |        |       | .3080661             | .5647582  |

### Model 3

| N_NLEQ5D5L_0           | Coef.     | Std. Err. | z      | P> z  | [95% Conf. Interval] |           |
|------------------------|-----------|-----------|--------|-------|----------------------|-----------|
| Comp_1                 |           |           |        |       |                      |           |
| N_QOL_dysphoriascore_0 | -.0005819 | .000115   | -5.06  | 0.000 | -.0008074            | -.0003564 |
| N_QOL_bodyimagescore_0 | -.0000496 | .0001116  | -0.44  | 0.657 | -.0002683            | .0001692  |
| _cons                  | .9170211  | .0102278  | 89.66  | 0.000 | .896975              | .9370672  |
| Comp_2                 |           |           |        |       |                      |           |
| N_QOL_dysphoriascore_0 | .0011631  | .000322   | 3.61   | 0.000 | .0005321             | .0017941  |
| N_QOL_bodyimagescore_0 | .0008845  | .0003775  | 2.34   | 0.019 | .0001447             | .0016243  |
| _cons                  | .6758889  | .0239743  | 28.19  | 0.000 | .6289001             | .7228777  |
| Comp_3                 |           |           |        |       |                      |           |
| N_QOL_dysphoriascore_0 | .0041291  | .0032791  | 1.26   | 0.208 | -.0022978            | .010556   |
| N_QOL_bodyimagescore_0 | -.0007499 | .0037602  | -0.20  | 0.842 | -.0081198            | .0066199  |
| _cons                  | .0353644  | .1584959  | 0.22   | 0.823 | -.2752819            | .3460106  |
| Comp_4                 |           |           |        |       |                      |           |
| N_QOL_dysphoriascore_0 | .002492   | .0008917  | 2.79   | 0.005 | .0007443             | .0042396  |
| N_QOL_bodyimagescore_0 | .0049927  | .0010213  | 4.89   | 0.000 | .0029911             | .0069944  |
| _cons                  | .1497876  | .076893   | 1.95   | 0.051 | -.0009198            | .3004951  |
| Prob_C1                |           |           |        |       |                      |           |
| _cons                  | -1.283383 | .3513122  | -3.65  | 0.000 | -1.971942            | -.5948238 |
| Prob_C2                |           |           |        |       |                      |           |
| _cons                  | -.1486043 | .2744568  | -0.54  | 0.588 | -.6865298            | .3893212  |
| Prob_C3                |           |           |        |       |                      |           |
| _cons                  | -1.804801 | .5771771  | -3.13  | 0.002 | -2.936047            | -.6735544 |
| /lns_1                 | -5.028607 | .3262587  | -15.41 | 0.000 | -5.668062            | -4.389152 |
| /lns_2                 | -3.368456 | .1562448  | -21.56 | 0.000 | -3.67469             | -3.062222 |
| /lns_3                 | -2.038223 | .4138256  | -4.93  | 0.000 | -2.849306            | -1.22714  |
| /lns_4                 | -2.215607 | .1348761  | -16.43 | 0.000 | -2.479959            | -1.951254 |
| sigma1                 | .0065479  | .0021363  |        |       | .0034546             | .0124113  |
| sigma2                 | .0344428  | .0053815  |        |       | .0253573             | .0467836  |
| sigma3                 | .13026    | .0539049  |        |       | .0578845             | .2931298  |
| sigma4                 | .1090873  | .0147133  |        |       | .0837467             | .1420957  |
| pi1                    | .1202936  | .0367355  |        |       | .0647648             | .2126091  |
| pi2                    | .3741716  | .0609985  |        |       | .2640711             | .4990479  |
| pi3                    | .0714157  | .035977   |        |       | .0258704             | .1821514  |
| pi4                    | .4341191  | .0601545  |        |       | .3162184             | .5520197  |

## Model 4

| N_NLEQ5D5L_0         | Coef.     | Std. Err. | z      | P> z  | [95% Conf. Interval] |           |
|----------------------|-----------|-----------|--------|-------|----------------------|-----------|
| <b>Comp_1</b>        |           |           |        |       |                      |           |
| N_QOL_totalscore_0   | .0000459  | .0002847  | 0.16   | 0.872 | -.0005122            | .000604   |
| Squared_IBSSSS_score | -9.98e-09 | 7.97e-08  | -0.13  | 0.900 | -1.66e-07            | 1.46e-07  |
| _cons                | .8686046  | .0245751  | 35.34  | 0.000 | .8204382             | .916771   |
| <b>Comp_2</b>        |           |           |        |       |                      |           |
| N_QOL_totalscore_0   | .006668   | .0014618  | 4.56   | 0.000 | .003803              | .0095329  |
| Squared_IBSSSS_score | -1.99e-06 | 5.91e-07  | -3.36  | 0.001 | -3.14e-06            | -8.28e-07 |
| _cons                | .3048719  | .1311956  | 2.32   | 0.020 | .0477333             | .5620106  |
| <b>Comp_3</b>        |           |           |        |       |                      |           |
| N_QOL_totalscore_0   | .0016212  | .0004181  | 3.88   | 0.000 | .0008018             | .0024406  |
| Squared_IBSSSS_score | -3.77e-07 | 1.74e-07  | -2.16  | 0.031 | -7.18e-07            | -3.53e-08 |
| _cons                | .7440232  | .0416033  | 17.88  | 0.000 | .6624822             | .8255643  |
| <b>Comp_4</b>        |           |           |        |       |                      |           |
| N_QOL_totalscore_0   | .0042949  | .0003908  | 10.99  | 0.000 | .0035291             | .0050608  |
| Squared_IBSSSS_score | -5.37e-07 | 1.63e-07  | -3.28  | 0.001 | -8.57e-07            | -2.16e-07 |
| _cons                | .499726   | .0336493  | 14.85  | 0.000 | .4337746             | .5656775  |
| <b>Prob_C1</b>       |           |           |        |       |                      |           |
| _cons                | -.0515761 | .3618687  | -0.14  | 0.887 | -.7608258            | .6576736  |
| <b>Prob_C2</b>       |           |           |        |       |                      |           |
| _cons                | .6374391  | .3091973  | 2.06   | 0.039 | .0314235             | 1.243455  |
| <b>Prob_C3</b>       |           |           |        |       |                      |           |
| _cons                | -.1170029 | .441314   | -0.27  | 0.791 | -.9819625            | .7479567  |
| /lns_1               | -4.141698 | .156953   | -26.39 | 0.000 | -4.44932             | -3.834076 |
| /lns_2               | -1.666758 | .0912376  | -18.27 | 0.000 | -1.845581            | -1.487936 |
| /lns_3               | -3.817968 | .2821738  | -13.53 | 0.000 | -4.371019            | -3.264918 |
| /lns_4               | -3.741095 | .2098454  | -17.83 | 0.000 | -4.152385            | -3.329806 |
| sigma1               | .0158958  | .0024949  |        |       | .0116865             | .0216213  |
| sigma2               | .1888583  | .017231   |        |       | .1579335             | .2258383  |
| sigma3               | .0219724  | .0062     |        |       | .0126384             | .0382001  |
| sigma4               | .0237281  | .0049792  |        |       | .0157269             | .0358001  |
| pi1                  | .2007488  | .047818   |        |       | .1228469             | .3105607  |
| pi2                  | .399842   | .0479099  |        |       | .3105752             | .4962963  |
| pi3                  | .1880349  | .0554494  |        |       | .1020503             | .320601   |
| pi4                  | .2113743  | .0499524  |        |       | .1134693             | .3092792  |

## Model 5

| N_NLEQ5D5L_0           | Coef.     | Std. Err. | z      | P> z  | [95% Conf. Interval] |           |
|------------------------|-----------|-----------|--------|-------|----------------------|-----------|
| <b>Comp_1</b>          |           |           |        |       |                      |           |
| N_QOL_dysphoriascore_0 | .0008095  | .0002873  | 2.82   | 0.005 | .0002465             | .0013726  |
| N_QOL_bodyimagescore_0 | .0008299  | .0002968  | 2.80   | 0.005 | .0002481             | .0014117  |
| Squared_IBSSSS_score   | 1.83e-08  | 1.35e-07  | 0.14   | 0.892 | -2.46e-07            | 2.83e-07  |
| N_LEEFTIJD_SCREENING   | -.0000816 | .0003741  | -0.22  | 0.827 | -.0008149            | .0006517  |
| _cons                  | .7203127  | .0334533  | 21.53  | 0.000 | .6547454             | .7858799  |
| <b>Comp_2</b>          |           |           |        |       |                      |           |
| N_QOL_dysphoriascore_0 | .0016245  | .0005256  | 3.09   | 0.002 | .0005943             | .0026546  |
| N_QOL_bodyimagescore_0 | .0030349  | .0005886  | 5.16   | 0.000 | .0018812             | .0041886  |
| Squared_IBSSSS_score   | -1.09e-06 | 2.28e-07  | -4.78  | 0.000 | -1.53e-06            | -6.42e-07 |
| N_LEEFTIJD_SCREENING   | -.0041577 | .0006712  | -6.19  | 0.000 | -.0054733            | -.0028421 |
| _cons                  | .6180535  | .0582951  | 10.60  | 0.000 | .5037972             | .7323099  |
| <b>Comp_3</b>          |           |           |        |       |                      |           |
| N_QOL_dysphoriascore_0 | -.0001995 | .0019624  | -0.10  | 0.919 | -.0040458            | .0036468  |
| N_QOL_bodyimagescore_0 | .0029985  | .0023042  | 1.30   | 0.193 | -.0015176            | .0075146  |
| Squared_IBSSSS_score   | -3.72e-06 | 9.38e-07  | -3.96  | 0.000 | -5.55e-06            | -1.88e-06 |
| N_LEEFTIJD_SCREENING   | -.0032107 | .0023475  | -1.37  | 0.171 | -.0078118            | .0013904  |
| _cons                  | .4602395  | .1310278  | 3.51   | 0.000 | .2034297             | .7170493  |
| <b>Comp_4</b>          |           |           |        |       |                      |           |
| N_QOL_dysphoriascore_0 | .002216   | .0009035  | 2.45   | 0.014 | .0004451             | .0039869  |
| N_QOL_bodyimagescore_0 | .0003956  | .0015278  | 0.26   | 0.796 | -.0025988            | .0033899  |
| Squared_IBSSSS_score   | -3.39e-06 | 5.84e-07  | -5.81  | 0.000 | -4.53e-06            | -2.25e-06 |
| N_LEEFTIJD_SCREENING   | .0035879  | .0026005  | 1.38   | 0.168 | -.0015089            | .0086847  |
| _cons                  | .5415439  | .095222   | 5.69   | 0.000 | .3549122             | .7281755  |
| <b>Prob_C1</b>         |           |           |        |       |                      |           |
| _cons                  | .939732   | .2758325  | 3.41   | 0.001 | .3991103             | 1.480354  |
| <b>Prob_C2</b>         |           |           |        |       |                      |           |
| _cons                  | .2276444  | .3204753  | 0.71   | 0.477 | -.4004757            | .8557644  |
| <b>Prob_C3</b>         |           |           |        |       |                      |           |
| _cons                  | -1.469592 | .4699436  | -3.13  | 0.002 | -2.390664            | -.5485192 |
| /lns_1                 | -3.224936 | .0993751  | -32.45 | 0.000 | -3.419707            | -3.030164 |
| /lns_2                 | -3.306219 | .1707842  | -19.36 | 0.000 | -3.64095             | -2.971488 |
| /lns_3                 | -2.794877 | .3660135  | -7.64  | 0.000 | -3.51225             | -2.077504 |
| /lns_4                 | -2.45808  | .2144867  | -11.46 | 0.000 | -2.878466            | -2.037693 |
| sigma1                 | .0397583  | .003951   |        |       | .032722              | .0483077  |
| sigma2                 | .0366545  | .00626    |        |       | .0262274             | .051227   |
| sigma3                 | .0611224  | .0223716  |        |       | .0298297             | .1252425  |
| sigma4                 | .0855992  | .0183599  |        |       | .056221              | .130329   |
| pi1                    | .5072981  | .053683   |        |       | .4032931             | .6106752  |
| pi2                    | .2488901  | .0483327  |        |       | .1664119             | .3548452  |
| pi3                    | .045594   | .0171066  |        |       | .0216299             | .0935688  |
| pi4                    | .1982179  | .0415872  |        |       | .1167086             | .2797272  |
